# Supplementary figures and images for: Ulex europaeus agglutinin-I-binding alpha-1,2-fucosylated glycan is applicable for the diagnosis and treatment of meningioma
Source: Research Square preprint supplement (doi:10.21203/rs.3.rs-8195063/v1), 2025-12-16

**Supplementary**


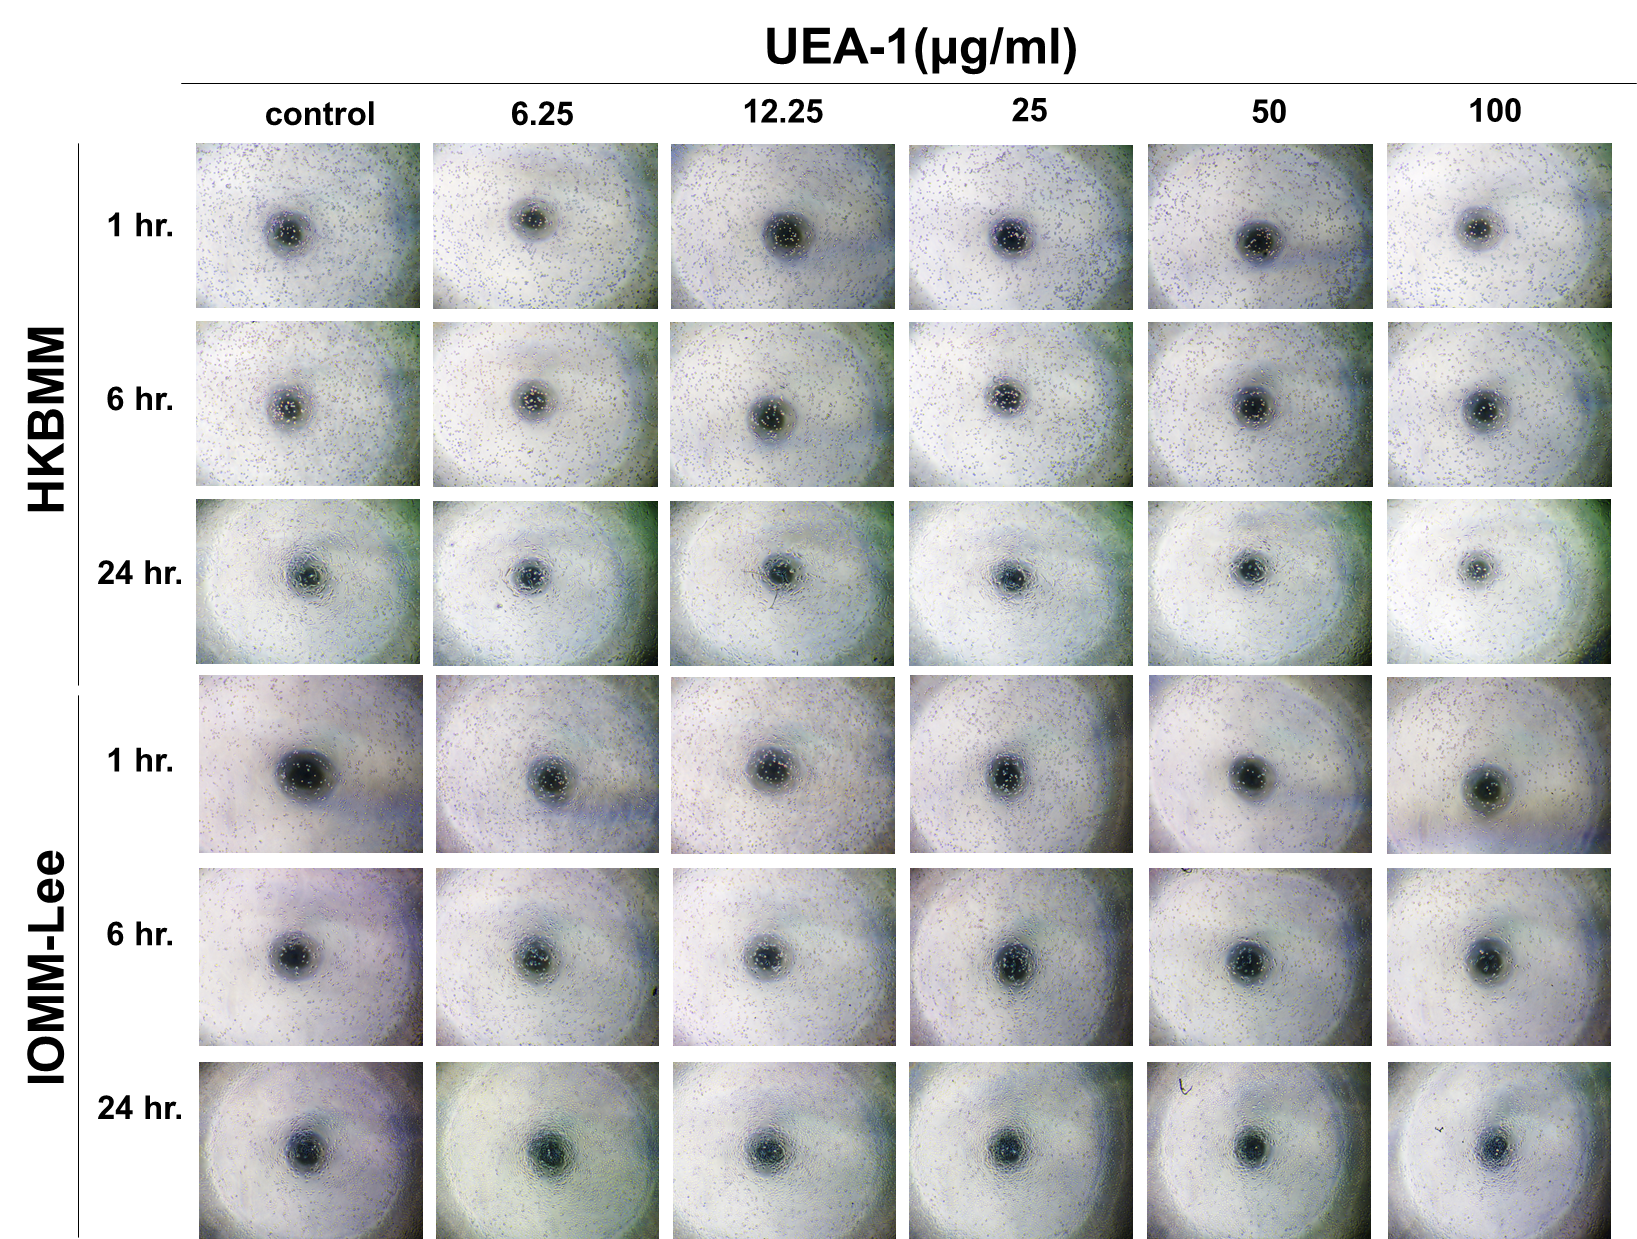


**Figure S1** Cell aggregation assay

Supplement: Supplementary file 1 [file cbda2f7667019744c853487b.docx]
